# Supplementary material
Source: publisher figshare collection journal article supplement (https://gsajournals.figshare.com/ndownloader/files/28101927)
Supplement: Supplementary file 1 [file 28101927]

## Sheet: Sheet1
GeneID	Nearest_ref_gene	IsoformID	Nearest_ref_transcript	Type	Symbol	Description	KEGG_A_class	KEGG_B_class	Pathway	K_ID	GO Component	GO Function	GO Process
Gene001662	CIL1348S0047	Isoform003609	CIL1348S0047	new	PAL	POPTRDRAFT_822571; phenylalanine ammonia-lyase family protein; K10775 phenylalanine ammonia-lyase [EC:4.3.1.24]	Metabolism	Biosynthesis of other secondary metabolites;Amino acid metabolism;Global and Overview	ko01100//Metabolic pathways;ko01110//Biosynthesis of secondary metabolites;ko00940//Phenylpropanoid biosynthesis;ko00360//Phenylalanine metabolism	K10775	GO:0044424//intracellular part;GO:0005622//intracellular;GO:0044464//cell part;GO:0005623//cell	GO:0016829//lyase activity;GO:0003824//catalytic activity;GO:0016841//ammonia-lyase activity;GO:0016840//carbon-nitrogen lyase activity	GO:0019748//secondary metabolic process;GO:1901362//organic cyclic compound biosynthetic process;GO:0006725//cellular aromatic compound metabolic process;GO:0071704//organic substance metabolic process;GO:0019752//carboxylic acid metabolic process;GO:0044238//primary metabolic process;GO:1901564//organonitrogen compound metabolic process;GO:0044550//secondary metabolite biosynthetic process;GO:00…
Gene001662	CIL1348S0047	Isoform003607	CIL1348S0047	new	PAL6	Phenylalanine ammonia-lyase 2; K10775 phenylalanine ammonia-lyase [EC:4.3.1.24]	Metabolism	Global and Overview;Amino acid metabolism;Biosynthesis of other secondary metabolites	ko01100//Metabolic pathways;ko01110//Biosynthesis of secondary metabolites;ko00940//Phenylpropanoid biosynthesis;ko00360//Phenylalanine metabolism	K10775	GO:0044424//intracellular part;GO:0044464//cell part;GO:0005622//intracellular;GO:0005623//cell	GO:0016841//ammonia-lyase activity;GO:0016829//lyase activity;GO:0003824//catalytic activity;GO:0016840//carbon-nitrogen lyase activity	GO:0009698//phenylpropanoid metabolic process;GO:1901360//organic cyclic compound metabolic process;GO:0044550//secondary metabolite biosynthetic process;GO:0044281//small molecule metabolic process;GO:0044710//single-organism metabolic process;GO:0006558//L-phenylalanine metabolic process;GO:0019752//carboxylic acid metabolic process;GO:0043436//oxoacid metabolic process;GO:0071704//organic subs…
Gene001662	CIL1348S0047	Isoform003608	CIL1348S0047	known	PAL6	PREDICTED: phenylalanine ammonia-lyase [Juglans regia]	Metabolism	Global and Overview;Biosynthesis of other secondary metabolites;Amino acid metabolism	ko01100//Metabolic pathways;ko01110//Biosynthesis of secondary metabolites;ko00940//Phenylpropanoid biosynthesis;ko00360//Phenylalanine metabolism	K10775	GO:0044464//cell part;GO:0005622//intracellular;GO:0005623//cell;GO:0044424//intracellular part	GO:0016829//lyase activity;GO:0016840//carbon-nitrogen lyase activity;GO:0016841//ammonia-lyase activity;GO:0003824//catalytic activity	GO:0019748//secondary metabolic process;GO:0044550//secondary metabolite biosynthetic process;GO:0008152//metabolic process;GO:0044763//single-organism cellular process;GO:0006807//nitrogen compound metabolic process;GO:0006520//cellular amino acid metabolic process;GO:0006725//cellular aromatic compound metabolic process;GO:0044249//cellular biosynthetic process;GO:0044237//cellular metabolic pr…
Gene002092	CIL1380S0021	Isoform004610	CIL1380S0021	known	CHS2	PREDICTED: chalcone synthase 2 [Juglans regia]	Metabolism;Organismal Systems	Global and Overview;Biosynthesis of other secondary metabolites;Environmental adaptation	ko01100//Metabolic pathways;ko01110//Biosynthesis of secondary metabolites;ko04712//Circadian rhythm - plant;ko00941//Flavonoid biosynthesis	K00660	GO:0043227//membrane-bounded organelle;GO:0005622//intracellular;GO:0044424//intracellular part;GO:0044444//cytoplasmic part;GO:0098588//bounding membrane of organelle;GO:0044446//intracellular organelle part;GO:0005737//cytoplasm;GO:0005623//cell;GO:0031090//organelle membrane;GO:0043229//intracellular organelle;GO:0044437//vacuolar part;GO:0016020//membrane;GO:0005773//vacuole;GO:0043226//organ…	GO:0003824//catalytic activity;GO:0016740//transferase activity;GO:0016747//transferase activity, transferring acyl groups other than amino-acyl groups;GO:0016746//transferase activity, transferring acyl groups	GO:0009411//response to UV;GO:0009058//biosynthetic process;GO:0006810//transport;GO:0044699//single-organism process;GO:0060918//auxin transport;GO:0010033//response to organic substance;GO:0044765//single-organism transport;GO:0065008//regulation of biological quality;GO:1901700//response to oxygen-containing compound;GO:0009743//response to carbohydrate;GO:0009812//flavonoid metabolic process;…
Gene002319	CIL1399S0001	Isoform005105	CIL1399S0001	known	CHS2	PREDICTED: chalcone synthase 1-like [Juglans regia]	Organismal Systems;Metabolism	Environmental adaptation;Biosynthesis of other secondary metabolites;Global and Overview	ko01100//Metabolic pathways;ko01110//Biosynthesis of secondary metabolites;ko04712//Circadian rhythm - plant;ko00941//Flavonoid biosynthesis	K00660	-	GO:0016747//transferase activity, transferring acyl groups other than amino-acyl groups;GO:0016746//transferase activity, transferring acyl groups;GO:0003824//catalytic activity;GO:0016740//transferase activity	GO:0008152//metabolic process
Gene004234	CIL1546S0028	Isoform009212	CIL1546S0028	new	CHI	chalcone--flavonone isomerase; K01859 chalcone isomerase [EC:5.5.1.6]	Metabolism	Biosynthesis of other secondary metabolites;Global and Overview	ko01100//Metabolic pathways;ko01110//Biosynthesis of secondary metabolites;ko00941//Flavonoid biosynthesis	K01859	-	-	-
Gene004284	CIL1549S0032	Isoform009353	CIL1549S0032	known	CHS2	PREDICTED: chalcone synthase 1 [Juglans regia]	Organismal Systems;Metabolism	Global and Overview;Biosynthesis of other secondary metabolites;Environmental adaptation	ko01100//Metabolic pathways;ko01110//Biosynthesis of secondary metabolites;ko04712//Circadian rhythm - plant;ko00941//Flavonoid biosynthesis	K00660	-	GO:0016740//transferase activity;GO:0016746//transferase activity, transferring acyl groups;GO:0003824//catalytic activity	GO:0008152//metabolic process
Gene004284	CIL1549S0032	Isoform009354	CIL1549S0032	new	CHS2	Chalcone and stilbene synthase family protein; K00660 chalcone synthase [EC:2.3.1.74]	Metabolism;Organismal Systems	Environmental adaptation;Biosynthesis of other secondary metabolites;Global and Overview	ko01100//Metabolic pathways;ko01110//Biosynthesis of secondary metabolites;ko04712//Circadian rhythm - plant;ko00941//Flavonoid biosynthesis	K00660	-	GO:0016746//transferase activity, transferring acyl groups;GO:0016740//transferase activity;GO:0003824//catalytic activity	GO:0008152//metabolic process
Gene005187	CIL0203S0007	Isoform011396	CIL0203S0007	new	DFR	DFR, dfr1; dihydroflavonol reductase (EC:1.1.1.219); K13082 bifunctional dihydroflavonol 4-reductase/flavanone 4-reductase [EC:1.1.1.219 1.1.1.234]	Metabolism	Global and Overview;Biosynthesis of other secondary metabolites	ko01100//Metabolic pathways;ko01110//Biosynthesis of secondary metabolites;ko00941//Flavonoid biosynthesis	K13082	GO:0044425//membrane part;GO:0016020//membrane;GO:0044464//cell part;GO:0005622//intracellular;GO:0043229//intracellular organelle;GO:0043226//organelle;GO:0043227//membrane-bounded organelle;GO:0005623//cell;GO:0044446//intracellular organelle part;GO:0044424//intracellular part;GO:0019898//extrinsic component of membrane;GO:0031090//organelle membrane;GO:0031312//extrinsic component of organell…	GO:0048037//cofactor binding;GO:0016491//oxidoreductase activity;GO:0005488//binding;GO:0003824//catalytic activity;GO:0016614//oxidoreductase activity, acting on CH-OH group of donors;GO:0016616//oxidoreductase activity, acting on the CH-OH group of donors, NAD or NADP as acceptor	GO:0034285//response to disaccharide;GO:0044699//single-organism process;GO:0009813//flavonoid biosynthetic process;GO:0008152//metabolic process;GO:0009416//response to light stimulus;GO:0009314//response to radiation;GO:0009628//response to abiotic stimulus;GO:0044710//single-organism metabolic process;GO:0050896//response to stimulus;GO:0009058//biosynthetic process;GO:1901576//organic substan…
Gene005187	CIL0203S0007	Isoform011397	CIL0203S0007	known	DFR	PREDICTED: dihydroflavonol-4-reductase-like [Juglans regia]	Metabolism	Biosynthesis of other secondary metabolites;Global and Overview	ko01100//Metabolic pathways;ko01110//Biosynthesis of secondary metabolites;ko00941//Flavonoid biosynthesis	K13082	GO:0005622//intracellular;GO:0031090//organelle membrane;GO:0044446//intracellular organelle part;GO:0043226//organelle;GO:0044464//cell part;GO:0005623//cell;GO:0044422//organelle part;GO:0031312//extrinsic component of organelle membrane;GO:0016020//membrane;GO:0043227//membrane-bounded organelle;GO:0019898//extrinsic component of membrane;GO:0043229//intracellular organelle;GO:0044424//intrace…	GO:0048037//cofactor binding;GO:0016616//oxidoreductase activity, acting on the CH-OH group of donors, NAD or NADP as acceptor;GO:0005488//binding;GO:0016614//oxidoreductase activity, acting on CH-OH group of donors;GO:0003824//catalytic activity;GO:0016491//oxidoreductase activity	GO:0009058//biosynthetic process;GO:0042221//response to chemical;GO:1901576//organic substance biosynthetic process;GO:0050896//response to stimulus;GO:0010033//response to organic substance;GO:0009628//response to abiotic stimulus;GO:0044710//single-organism metabolic process;GO:0009314//response to radiation;GO:0009411//response to UV;GO:1901700//response to oxygen-containing compound;GO:00098…
Gene005577	CIL0286S0006	Isoform012313	CIL0286S0006	new	FLS	flavonol synthase/flavanone 3-hydroxylase-like	-	-	-	-	-	GO:0043167//ion binding;GO:0043169//cation binding;GO:0016491//oxidoreductase activity;GO:0016705//oxidoreductase activity, acting on paired donors, with incorporation or reduction of molecular oxygen;GO:0003824//catalytic activity;GO:0005488//binding	GO:0008152//metabolic process;GO:0044699//single-organism process;GO:0044710//single-organism metabolic process
Gene005616	CIL0301S0006	Isoform012399	CIL0301S0006	known	CHI3	PREDICTED: probable chalcone--flavonone isomerase 3 [Juglans regia]	Metabolism	Global and Overview;Biosynthesis of other secondary metabolites	ko01100//Metabolic pathways;ko01110//Biosynthesis of secondary metabolites;ko00941//Flavonoid biosynthesis	K01859	-	GO:0003824//catalytic activity;GO:0016853//isomerase activity;GO:0016872//intramolecular lyase activity	GO:0010033//response to organic substance;GO:0009743//response to carbohydrate;GO:0009416//response to light stimulus;GO:0009411//response to UV;GO:1901700//response to oxygen-containing compound;GO:0009628//response to abiotic stimulus;GO:0008152//metabolic process;GO:0009314//response to radiation;GO:0034285//response to disaccharide;GO:0042221//response to chemical;GO:0050896//response to stim…
Gene005699	CIL0320S0016	Isoform012570	CIL0320S0016	known	C4H	PREDICTED: trans-cinnamate 4-monooxygenase-like isoform X1 [Juglans regia]	Metabolism	Global and Overview;Metabolism of cofactors and vitamins;Biosynthesis of other secondary metabolites;Amino acid metabolism	ko01100//Metabolic pathways;ko01110//Biosynthesis of secondary metabolites;ko00940//Phenylpropanoid biosynthesis;ko00360//Phenylalanine metabolism;ko00130//Ubiquinone and other terpenoid-quinone biosynthesis;ko00941//Flavonoid biosynthesis;ko00945//Stilbenoid, diarylheptanoid and gingerol biosynthesis	K00487	-	GO:0043169//cation binding;GO:0046872//metal ion binding;GO:0097159//organic cyclic compound binding;GO:0005488//binding;GO:0016491//oxidoreductase activity;GO:0046914//transition metal ion binding;GO:0016709//oxidoreductase activity, acting on paired donors, with incorporation or reduction of molecular oxygen, NAD(P)H as one donor, and incorporation of one atom of oxygen;GO:0043167//ion binding;…	GO:0044710//single-organism metabolic process;GO:0008152//metabolic process;GO:0044699//single-organism process
Gene005778	CIL0006S0011	Isoform012723	CIL0006S0011	known	CHS	PREDICTED: chalcone synthase-like [Juglans regia]	Organismal Systems;Metabolism	Global and Overview;Biosynthesis of other secondary metabolites;Environmental adaptation	ko01100//Metabolic pathways;ko01110//Biosynthesis of secondary metabolites;ko04712//Circadian rhythm - plant;ko00941//Flavonoid biosynthesis	K00660	GO:0044437//vacuolar part;GO:0043227//membrane-bounded organelle;GO:0043231//intracellular membrane-bounded organelle;GO:0044444//cytoplasmic part;GO:0044446//intracellular organelle part;GO:0031090//organelle membrane;GO:0044424//intracellular part;GO:0098805//whole membrane;GO:0005773//vacuole;GO:0005774//vacuolar membrane;GO:0005623//cell;GO:0044464//cell part;GO:0043226//organelle;GO:0016020/…	GO:0016740//transferase activity;GO:0003824//catalytic activity;GO:0016747//transferase activity, transferring acyl groups other than amino-acyl groups;GO:0016746//transferase activity, transferring acyl groups	GO:1901700//response to oxygen-containing compound;GO:0009416//response to light stimulus;GO:0009813//flavonoid biosynthetic process;GO:0010033//response to organic substance;GO:0042221//response to chemical;GO:0009812//flavonoid metabolic process;GO:0050896//response to stimulus;GO:0009314//response to radiation;GO:0009914//hormone transport;GO:0065008//regulation of biological quality;GO:001081…
Gene006225	CIL0492S0001	Isoform013666	CIL0492S0001	known	4CLL7	PREDICTED: 4-coumarate--CoA ligase-like 7 [Ricinus communis]	Metabolism	Global and Overview;Biosynthesis of other secondary metabolites;Metabolism of cofactors and vitamins;Amino acid metabolism	ko01100//Metabolic pathways;ko01110//Biosynthesis of secondary metabolites;ko00940//Phenylpropanoid biosynthesis;ko00360//Phenylalanine metabolism;ko00130//Ubiquinone and other terpenoid-quinone biosynthesis	K01904	-	GO:0016491//oxidoreductase activity;GO:0016701//oxidoreductase activity, acting on single donors with incorporation of molecular oxygen;GO:0016703//oxidoreductase activity, acting on single donors with incorporation of molecular oxygen, incorporation of one atom of oxygen (internal monooxygenases or internal mixed function oxidases);GO:0004497//monooxygenase activity;GO:0003824//catalytic activity	GO:0044699//single-organism process;GO:0008152//metabolic process;GO:0044710//single-organism metabolic process
Gene006263	CIL0526S0001	Isoform013745	CIL0526S0001	known	ANS	PREDICTED: leucoanthocyanidin dioxygenase [Juglans regia]	Metabolism	Global and Overview;Biosynthesis of other secondary metabolites	ko01100//Metabolic pathways;ko01110//Biosynthesis of secondary metabolites;ko00941//Flavonoid biosynthesis	K05277	-	GO:0016491//oxidoreductase activity;GO:0003824//catalytic activity;GO:0036094//small molecule binding;GO:0016705//oxidoreductase activity, acting on paired donors, with incorporation or reduction of molecular oxygen;GO:0019842//vitamin binding;GO:0005488//binding;GO:0051213//dioxygenase activity;GO:0043167//ion binding;GO:0016706//oxidoreductase activity, acting on paired donors, with incorporati…	GO:0006725//cellular aromatic compound metabolic process;GO:1901360//organic cyclic compound metabolic process;GO:0044710//single-organism metabolic process;GO:0009699//phenylpropanoid biosynthetic process;GO:0044249//cellular biosynthetic process;GO:0008152//metabolic process;GO:1901362//organic cyclic compound biosynthetic process;GO:0009813//flavonoid biosynthetic process;GO:0019438//aromatic …
Gene006987	CIL0899S0128	Isoform015290	CIL0899S0128	new	LAR	leucoanthocyanidin reductase-like; K13081 leucoanthocyanidin reductase [EC:1.17.1.3]	Metabolism	Global and Overview;Biosynthesis of other secondary metabolites	ko01110//Biosynthesis of secondary metabolites;ko00941//Flavonoid biosynthesis	K13081	-	-	-
Gene007109	CIL0902S0009	Isoform015564	CIL0902S0009	new	4CLL6	4-coumarate--CoA ligase-like 6; K01904 4-coumarate--CoA ligase [EC:6.2.1.12]	Metabolism	Global and Overview;Metabolism of cofactors and vitamins;Biosynthesis of other secondary metabolites;Amino acid metabolism	ko01100//Metabolic pathways;ko01110//Biosynthesis of secondary metabolites;ko00940//Phenylpropanoid biosynthesis;ko00360//Phenylalanine metabolism;ko00130//Ubiquinone and other terpenoid-quinone biosynthesis	K01904	GO:0043229//intracellular organelle;GO:0043227//membrane-bounded organelle;GO:0043231//intracellular membrane-bounded organelle;GO:0044464//cell part;GO:0044444//cytoplasmic part;GO:0005622//intracellular;GO:0043226//organelle;GO:0042579//microbody;GO:0044424//intracellular part;GO:0005623//cell;GO:0005737//cytoplasm	GO:0001882//nucleoside binding;GO:0097367//carbohydrate derivative binding;GO:0005488//binding;GO:1901363//heterocyclic compound binding;GO:0016491//oxidoreductase activity;GO:0032549//ribonucleoside binding;GO:0097159//organic cyclic compound binding;GO:0032550//purine ribonucleoside binding;GO:0036094//small molecule binding;GO:0003824//catalytic activity;GO:0001883//purine nucleoside binding	GO:0051707//response to other organism;GO:0051704//multi-organism process;GO:0044248//cellular catabolic process;GO:0043207//response to external biotic stimulus;GO:0009987//cellular process;GO:0009608//response to symbiont;GO:0050896//response to stimulus;GO:0009607//response to biotic stimulus;GO:0008152//metabolic process;GO:0009605//response to external stimulus;GO:0044237//cellular metabolic…
Gene007109	CIL0902S0009	Isoform015565	CIL0902S0009	new	4CLL6	4-coumarate--CoA ligase-like 6; K01904 4-coumarate--CoA ligase [EC:6.2.1.12]	Metabolism	Amino acid metabolism;Biosynthesis of other secondary metabolites;Metabolism of cofactors and vitamins;Global and Overview	ko01100//Metabolic pathways;ko01110//Biosynthesis of secondary metabolites;ko00940//Phenylpropanoid biosynthesis;ko00360//Phenylalanine metabolism;ko00130//Ubiquinone and other terpenoid-quinone biosynthesis	K01904	GO:0044444//cytoplasmic part;GO:0005622//intracellular;GO:0005623//cell;GO:0005737//cytoplasm;GO:0043229//intracellular organelle;GO:0042579//microbody;GO:0044424//intracellular part;GO:0043226//organelle;GO:0044464//cell part;GO:0043227//membrane-bounded organelle;GO:0043231//intracellular membrane-bounded organelle	GO:0003824//catalytic activity;GO:0097159//organic cyclic compound binding;GO:0005488//binding;GO:0036094//small molecule binding;GO:0032549//ribonucleoside binding;GO:0032550//purine ribonucleoside binding;GO:1901363//heterocyclic compound binding;GO:0001882//nucleoside binding;GO:0097367//carbohydrate derivative binding;GO:0001883//purine nucleoside binding	GO:0009608//response to symbiont;GO:0043207//response to external biotic stimulus;GO:0008152//metabolic process;GO:0009605//response to external stimulus;GO:0044248//cellular catabolic process;GO:0051707//response to other organism;GO:0009607//response to biotic stimulus;GO:0009056//catabolic process;GO:0044237//cellular metabolic process;GO:0050896//response to stimulus;GO:0051704//multi-organis…
Gene008527	CIL0940S0048	Isoform018838	CIL0940S0048	new	FLS	flavonol synthase/flavanone 3-hydroxylase-like	-	-	-	-	-	GO:0005488//binding;GO:0043167//ion binding;GO:0051213//dioxygenase activity;GO:0003824//catalytic activity;GO:0043169//cation binding;GO:0016491//oxidoreductase activity;GO:0016705//oxidoreductase activity, acting on paired donors, with incorporation or reduction of molecular oxygen;GO:0016706//oxidoreductase activity, acting on paired donors, with incorporation or reduction of molecular oxygen,…	GO:0051553//flavone biosynthetic process;GO:0009812//flavonoid metabolic process;GO:1901576//organic substance biosynthetic process;GO:0071704//organic substance metabolic process;GO:0008152//metabolic process;GO:0051552//flavone metabolic process;GO:0042440//pigment metabolic process;GO:0044699//single-organism process;GO:0046148//pigment biosynthetic process;GO:0009058//biosynthetic process;GO:…
Gene010742	CIL1020S0081	Isoform023947	CIL1020S0081	new	F3H	naringenin,2-oxoglutarate 3-dioxygenase; K00475 naringenin 3-dioxygenase [EC:1.14.11.9]	Metabolism	Global and Overview;Biosynthesis of other secondary metabolites	ko01100//Metabolic pathways;ko01110//Biosynthesis of secondary metabolites;ko00941//Flavonoid biosynthesis	K00475	-	GO:0051213//dioxygenase activity;GO:0019842//vitamin binding;GO:0043167//ion binding;GO:0016705//oxidoreductase activity, acting on paired donors, with incorporation or reduction of molecular oxygen;GO:0016706//oxidoreductase activity, acting on paired donors, with incorporation or reduction of molecular oxygen, 2-oxoglutarate as one donor, and incorporation of one atom each of oxygen into both d…	GO:0009812//flavonoid metabolic process;GO:0044710//single-organism metabolic process;GO:0071704//organic substance metabolic process;GO:0044699//single-organism process;GO:0008152//metabolic process
Gene012881	CIL1099S0044	Isoform028612	CIL1099S0044	new	ANR	ANR, ban; anthocyanidin reductase; K08695 anthocyanidin reductase [EC:1.3.1.77]	Metabolism	Biosynthesis of other secondary metabolites;Global and Overview	ko01110//Biosynthesis of secondary metabolites;ko00941//Flavonoid biosynthesis	K08695	-	GO:0016491//oxidoreductase activity;GO:0016627//oxidoreductase activity, acting on the CH-CH group of donors;GO:0016628//oxidoreductase activity, acting on the CH-CH group of donors, NAD or NADP as acceptor;GO:0003824//catalytic activity;GO:0005488//binding;GO:0048037//cofactor binding	GO:0065007//biological regulation;GO:0009890//negative regulation of biosynthetic process;GO:0009812//flavonoid metabolic process;GO:0009892//negative regulation of metabolic process;GO:0071704//organic substance metabolic process;GO:0048519//negative regulation of biological process;GO:0009889//regulation of biosynthetic process;GO:0019222//regulation of metabolic process;GO:0008152//metabolic p…
Gene012881	CIL1099S0044	Isoform028613	CIL1099S0044	new	ANR	ANR, ban; anthocyanidin reductase; K08695 anthocyanidin reductase [EC:1.3.1.77]	Metabolism	Biosynthesis of other secondary metabolites;Global and Overview	ko01110//Biosynthesis of secondary metabolites;ko00941//Flavonoid biosynthesis	K08695	-	-	-
Gene013073	CIL1105S0008	Isoform029077	CIL1105S0008	new	4CLL7	4-coumarate--CoA ligase-like 7; K01904 4-coumarate--CoA ligase [EC:6.2.1.12]	Metabolism	Global and Overview;Amino acid metabolism;Metabolism of cofactors and vitamins;Biosynthesis of other secondary metabolites	ko01100//Metabolic pathways;ko01110//Biosynthesis of secondary metabolites;ko00940//Phenylpropanoid biosynthesis;ko00360//Phenylalanine metabolism;ko00130//Ubiquinone and other terpenoid-quinone biosynthesis	K01904	-	GO:0016703//oxidoreductase activity, acting on single donors with incorporation of molecular oxygen, incorporation of one atom of oxygen (internal monooxygenases or internal mixed function oxidases);GO:0016701//oxidoreductase activity, acting on single donors with incorporation of molecular oxygen;GO:0004497//monooxygenase activity;GO:0003824//catalytic activity;GO:0016491//oxidoreductase activity	GO:0008152//metabolic process;GO:0044710//single-organism metabolic process;GO:0044699//single-organism process
Gene013073	CIL1105S0008	Isoform029079	CIL1105S0008	new	4CLL7	4-coumarate--CoA ligase-like 7; K01904 4-coumarate--CoA ligase [EC:6.2.1.12]	Metabolism	Global and Overview;Biosynthesis of other secondary metabolites;Metabolism of cofactors and vitamins;Amino acid metabolism	ko01100//Metabolic pathways;ko01110//Biosynthesis of secondary metabolites;ko00940//Phenylpropanoid biosynthesis;ko00360//Phenylalanine metabolism;ko00130//Ubiquinone and other terpenoid-quinone biosynthesis	K01904	-	GO:0016701//oxidoreductase activity, acting on single donors with incorporation of molecular oxygen;GO:0016703//oxidoreductase activity, acting on single donors with incorporation of molecular oxygen, incorporation of one atom of oxygen (internal monooxygenases or internal mixed function oxidases);GO:0003824//catalytic activity;GO:0004497//monooxygenase activity;GO:0016491//oxidoreductase activity	GO:0044710//single-organism metabolic process;GO:0044699//single-organism process;GO:0008152//metabolic process
Gene014389	CIL1151S0021,CIL1151S0022	Isoform032080	CIL1151S0021,CIL1151S0022	new	C4H	trans-cinnamate 4-monooxygenase; K00487 trans-cinnamate 4-monooxygenase [EC:1.14.13.11]	Metabolism	Global and Overview;Biosynthesis of other secondary metabolites;Metabolism of cofactors and vitamins;Amino acid metabolism	ko01100//Metabolic pathways;ko01110//Biosynthesis of secondary metabolites;ko00940//Phenylpropanoid biosynthesis;ko00360//Phenylalanine metabolism;ko00130//Ubiquinone and other terpenoid-quinone biosynthesis;ko00941//Flavonoid biosynthesis;ko00945//Stilbenoid, diarylheptanoid and gingerol biosynthesis;ko01220//Degradation of aromatic compounds	K00487	-	GO:0046872//metal ion binding;GO:1901363//heterocyclic compound binding;GO:0046906//tetrapyrrole binding;GO:0003824//catalytic activity;GO:0043169//cation binding;GO:0046914//transition metal ion binding;GO:0016491//oxidoreductase activity;GO:0043167//ion binding;GO:0005488//binding;GO:0097159//organic cyclic compound binding	GO:0008152//metabolic process;GO:0044699//single-organism process;GO:0044710//single-organism metabolic process
Gene014663	CIL1158S0043	Isoform032875	CIL1158S0043	new	4CL1	4-coumarate--CoA ligase 2-like; K01904 4-coumarate--CoA ligase [EC:6.2.1.12]	Metabolism	Amino acid metabolism;Biosynthesis of other secondary metabolites;Metabolism of cofactors and vitamins;Global and Overview	ko01100//Metabolic pathways;ko01110//Biosynthesis of secondary metabolites;ko00940//Phenylpropanoid biosynthesis;ko00360//Phenylalanine metabolism;ko00130//Ubiquinone and other terpenoid-quinone biosynthesis	K01904	-	GO:0016701//oxidoreductase activity, acting on single donors with incorporation of molecular oxygen;GO:0003824//catalytic activity;GO:0016703//oxidoreductase activity, acting on single donors with incorporation of molecular oxygen, incorporation of one atom of oxygen (internal monooxygenases or internal mixed function oxidases);GO:0004497//monooxygenase activity;GO:0016491//oxidoreductase activity	GO:0008152//metabolic process;GO:0044699//single-organism process;GO:0044710//single-organism metabolic process
Gene014787	-	Isoform033121	-	novel	FLS	flavonol synthase/flavanone 3-hydroxylase-like	-	-	-	-	-	GO:0043169//cation binding;GO:0016705//oxidoreductase activity, acting on paired donors, with incorporation or reduction of molecular oxygen;GO:0016491//oxidoreductase activity;GO:0016706//oxidoreductase activity, acting on paired donors, with incorporation or reduction of molecular oxygen, 2-oxoglutarate as one donor, and incorporation of one atom each of oxygen into both donors;GO:0051213//diox…	GO:0009058//biosynthetic process;GO:0051553//flavone biosynthetic process;GO:0008152//metabolic process;GO:0044699//single-organism process;GO:0051552//flavone metabolic process;GO:0046148//pigment biosynthetic process;GO:0009813//flavonoid biosynthetic process;GO:0009812//flavonoid metabolic process;GO:0071704//organic substance metabolic process;GO:0044710//single-organism metabolic process;GO:…
Gene015414	CIL1192S0044	Isoform034563	CIL1192S0044	new	-	4-coumarate:CoA ligase 3; K01904 4-coumarate--CoA ligase [EC:6.2.1.12]	Metabolism	Amino acid metabolism;Biosynthesis of other secondary metabolites;Metabolism of cofactors and vitamins;Global and Overview	ko01100//Metabolic pathways;ko01110//Biosynthesis of secondary metabolites;ko00940//Phenylpropanoid biosynthesis;ko00360//Phenylalanine metabolism;ko00130//Ubiquinone and other terpenoid-quinone biosynthesis	K01904	-	GO:0016405//CoA-ligase activity;GO:0032549//ribonucleoside binding;GO:0005488//binding;GO:0001882//nucleoside binding;GO:1901363//heterocyclic compound binding;GO:0016874//ligase activity;GO:0032550//purine ribonucleoside binding;GO:0036094//small molecule binding;GO:0016877//ligase activity, forming carbon-sulfur bonds;GO:0001883//purine nucleoside binding;GO:0003824//catalytic activity;GO:00973…	GO:0010208//pollen wall assembly;GO:0008152//metabolic process;GO:0044237//cellular metabolic process;GO:0009813//flavonoid biosynthetic process;GO:0071840//cellular component organization or biogenesis;GO:0009416//response to light stimulus;GO:1901700//response to oxygen-containing compound;GO:0048229//gametophyte development;GO:0034285//response to disaccharide;GO:0071704//organic substance met…
